# Supplementary material for: Blue-emitting bis-tridentate Ir(iii) phosphors: OLED performances vs. substituent effects
Source: Royal Society of Chemistry journal article supplement (doi:10.1039/c8tc03194k), 2018-01-01
Supplement: c8tc03194k1.pdf [file c8tc03194k1.pdf]

## Supporting Information

Blue-Emitting Bis-tridentate Ir(III) Phosphors: OLED Performances vs. Substituent Effects

Hsin-Hung Kuo, Ling-Yang Hsu, Jen-Yung Tso, Wen-Yi Hung,\* Shih-Hung Liu, Pi-Tai Chou,\* Ken-Tsung Wong, Ze-lin Zhu, Chun-Sing Lee, Alex K.-Y. Jen,\* and Yun Chi\*

Hsin-Hung Kuo, Ling-Yang Hsu, Prof. Yun Chi

Department of Chemistry and Frontier Research Center on Fundamental and Applied Sciences of Matters, National Tsing Hua University, Hsinchu 30013, Taiwan.

Jen-Yung Tso, Prof. Wen-Yi Hung

Institute of Optoelectronic Sciences, National Taiwan Ocean University, Keelung 20224, Taiwan.

Dr. Shih-Hung Liu, Prof. Pi-Tai Chou, Prof. Ken-Tsung Wong

Department of Chemistry and Instrumentation Center, National Taiwan University, Taipei 10617, Taiwan.

Ze-lin Zhu, Prof. Chun-Sing Lee,

Center of Super-Diamond and Advanced Films (COSDAF) and Department of Chemistry, City University of Hong Kong, Hong Kong SAR.

Prof. Alex K.-Y. Jen, Prof. Yun Chi

Department of Materials Science and Engineering and Department of Chemistry, City University of Hong Kong, Hong Kong SAR.

## Experimental section:

### General information:

**Electrochemistry:** Cyclic voltammetry was conducted on a CHI621A Electrochemical Analyzer, equipped with a Ag/Ag<sup>+</sup> reference electrode. The oxidation and reduction potentials were measured using a platinum working electrode with 0.1 M of [NBu<sub>4</sub>PF<sub>6</sub>] in CH<sub>2</sub>Cl<sub>2</sub> and a gold wire with 0.1M of [NBu<sub>4</sub>PF<sub>6</sub>] in THF, respectively. The potentials were referenced externally to the ferrocenium/ferrocene (Fc<sup>+</sup>/Fc) couple.

**Photophysical measurements:** UV-Vis spectra were recorded on a HITACHI U-3900 spectrophotometer. The steady-state emission spectra and lifetime studies were measured with Edinburgh FL 900 photon-counting system. Both wavelength-dependent excitation and emission responses of the fluorimeter were calibrated. Spectral grade solvents (Merck) were used as received. To determine the photoluminescence quantum yield in solution, samples were degassed using at least three freeze-pump-thaw cycles. The solution quantum yields are calculated using the standard sample which has a known quantum yield, according to the following equation

$$\Phi = \Phi_R \frac{I}{I_R} \frac{A_R}{A} \frac{\eta^2}{\eta_R^2}$$

where  $\Phi$  is the quantum yield, the subscript R refers to the reference compound of known quantum yield, I is the integrated fluorescence intensity and  $\eta$  is the refractive index of the solvent. A is the absorbance at the excitation wavelength with the value of absorbance between 0.02 ~ 0.05.

Lifetime studies were performed by an Edinburgh FL 900 time correlated single photon counting (TCSPC) system with an EPL-375 diode laser as the excitation source. Data were analyzed using a nonlinear least-squares procedure in combination with an iterative convolution method. The emission decays were fitted by the sum of exponential functions with a temporal resolution of ~ 300 ps after the deconvolution of instrument response function.

### **Computational Method.**

All calculations were performed with the Gaussian 09 program package.<sup>[1]</sup> The geometry optimization of ground states of the six Ir(III) complexes are simulated with density functional theory (DFT) at the hybrid functional PBE1PBE/LANL2DZ (Ir) and PBE1PBE/6-31g(d,p) (H, C, N, F) levels using CH<sub>2</sub>Cl<sub>2</sub> as the solvent. The optimized structures of the six Ir(III) complexes are then used to calculate the five lowest singlet ( $S_0 \rightarrow S_5$ ) and triplet optical electronic transitions ( $S_0 \rightarrow T_5$ ) using the time-dependent density functional theory (TD-DFT) method. The solvent effect is based on the polarizable continuum model (PCM), which is supported implemented in the Gaussian 09 program. For both singlet and triplet optical transitions Mulliken population analysis (MPA) is applied to obtain the electron density distribution of each atom in specific molecular orbital of the Ir(III) complexes as well as to calculate the metal-to-ligand charge transfer (MLCT) in each assignment during the singlet and triplet optical transitions.

### **OLED Device Fabrication**

All chemicals were purified through vacuum sublimation prior to use. The OLEDs were fabricated through vacuum deposition of the materials at  $10^{-6}$  Torr onto the ITO-coated glass substrates having a sheet resistance of  $15 \Omega \text{ sq}^{-1}$ . Prior to use the ITO surface was cleaned ultrasonically; i.e. with acetone, methanol, and deionized water in sequence and finally with UV-ozone. The deposition rate of each organic material was ca.  $1\text{--}2 \text{ \AA s}^{-1}$ . The  $J\text{--}V\text{--}L$  characteristics of the devices were measured simultaneously in a glove-box using a Keithley 2614B source meter equipped with a calibration Si-photodiode. EL spectra were measured using a photodiode array (Ocean Optics USB2000+).

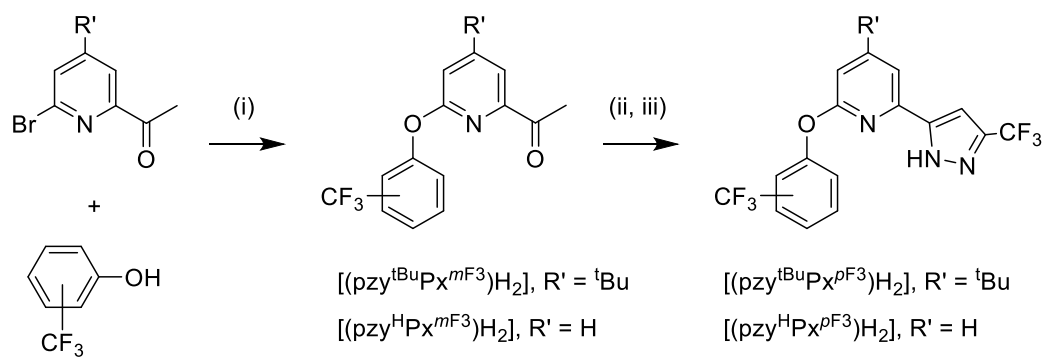

**Scheme S1.** Synthetic procedure for the dianionic chromophoric chelates LH<sub>2</sub>. Experimental conditions: (i) picolinic acid, CuI, DMSO, K<sub>3</sub>PO<sub>4</sub>; (ii) NaOEt, CF<sub>3</sub>CO<sub>2</sub>Et, THF, reflux; (iii) N<sub>2</sub>H<sub>4</sub>, EtOH, reflux.

In **Tables S1 to S6** we have calculated both  $S_0 \rightarrow T_1$  and  $T_1 \rightarrow S_0$  transition properties based on geometry optimized  $S_0$  and  $T_1$ , respectively. As for the emission properties it is more appropriate to apply the calculation of  $T_1 \rightarrow S_0$  transition to compare with the experimental results, as elaborated in the text.

**Table S1(a).** The calculated wavelengths, transition probabilities and charge transfer character of the optical absorptions for Ir(III) complex **Px-11** in  $\text{CH}_2\text{Cl}_2$ .

| State | $\lambda$ (nm) | $f$    | Assignments                                                                                                                                                             | MLCT   |
|-------|----------------|--------|-------------------------------------------------------------------------------------------------------------------------------------------------------------------------|--------|
| $T_1$ | 409.3          | 0      | HOMO-3 $\rightarrow$ LUMO(49%) HOMO-2 $\rightarrow$ LUMO(17%)<br>HOMO-2 $\rightarrow$ LUMO+1(16%) HOMO-3 $\rightarrow$ LUMO+1(5%)                                       | 16.49% |
| $T_2$ | 384            | 0      | HOMO-1 $\rightarrow$ LUMO+3(31%) HOMO-4 $\rightarrow$ LUMO+2(18%)<br>HOMO-1 $\rightarrow$ LUMO+2(14%) HOMO-1 $\rightarrow$ LUMO+6(10%)<br>HOMO $\rightarrow$ LUMO+2(7%) | 13.23% |
| $T_3$ | 371.3          | 0      | HOMO-2 $\rightarrow$ LUMO(27%) HOMO-2 $\rightarrow$ LUMO+1(17%)<br>HOMO $\rightarrow$ LUMO+1(14%) HOMO $\rightarrow$ LUMO(8%)<br>HOMO $\rightarrow$ LUMO+4(5%)          | 18.24% |
| $T_4$ | 358.4          | 0      | HOMO $\rightarrow$ LUMO(77%)                                                                                                                                            | 26.16% |
| $T_5$ | 351.1          | 0      | HOMO-2 $\rightarrow$ LUMO(42%) HOMO-3 $\rightarrow$ LUMO(11%)<br>HOMO $\rightarrow$ LUMO+4(8%)                                                                          | 12.84% |
| $S_1$ | 341.3          | 0.0102 | HOMO $\rightarrow$ LUMO(97%)                                                                                                                                            | 32.95% |
| $S_2$ | 330.9          | 0.0049 | HOMO-1 $\rightarrow$ LUMO(97%)                                                                                                                                          | 25.32% |
| $S_3$ | 319.7          | 0.1657 | HOMO-2 $\rightarrow$ LUMO(88%)                                                                                                                                          | 17.08% |
| $S_4$ | 296.6          | 0.0441 | HOMO $\rightarrow$ LUMO+1(88%)                                                                                                                                          | 31.40% |
| $S_5$ | 293.9          | 0.0051 | HOMO $\rightarrow$ LUMO+3(55%) HOMO-1 $\rightarrow$ LUMO+2(27%)<br>HOMO-1 $\rightarrow$ LUMO+3(7%)                                                                      | 21.45% |

**Table S1(b).** The calculated wavelengths, transition probabilities and charge transfer character of the lowest emission for Ir(III) complex **PX-11** in  $\text{CH}_2\text{Cl}_2$ .

| State                 | $\lambda$ (nm) | $f$    | Assignments                                                   | MLCT   |
|-----------------------|----------------|--------|---------------------------------------------------------------|--------|
| $T_1 \rightarrow S_0$ | 546.3          | 0      | LUMO $\rightarrow$ HOMO-2(73%) LUMO $\rightarrow$ HOMO-3(16%) | 8.45%  |
| $S_1 \rightarrow S_0$ | 433.4          | 0.0159 | LUMO $\rightarrow$ HOMO(99%)                                  | 30.12% |

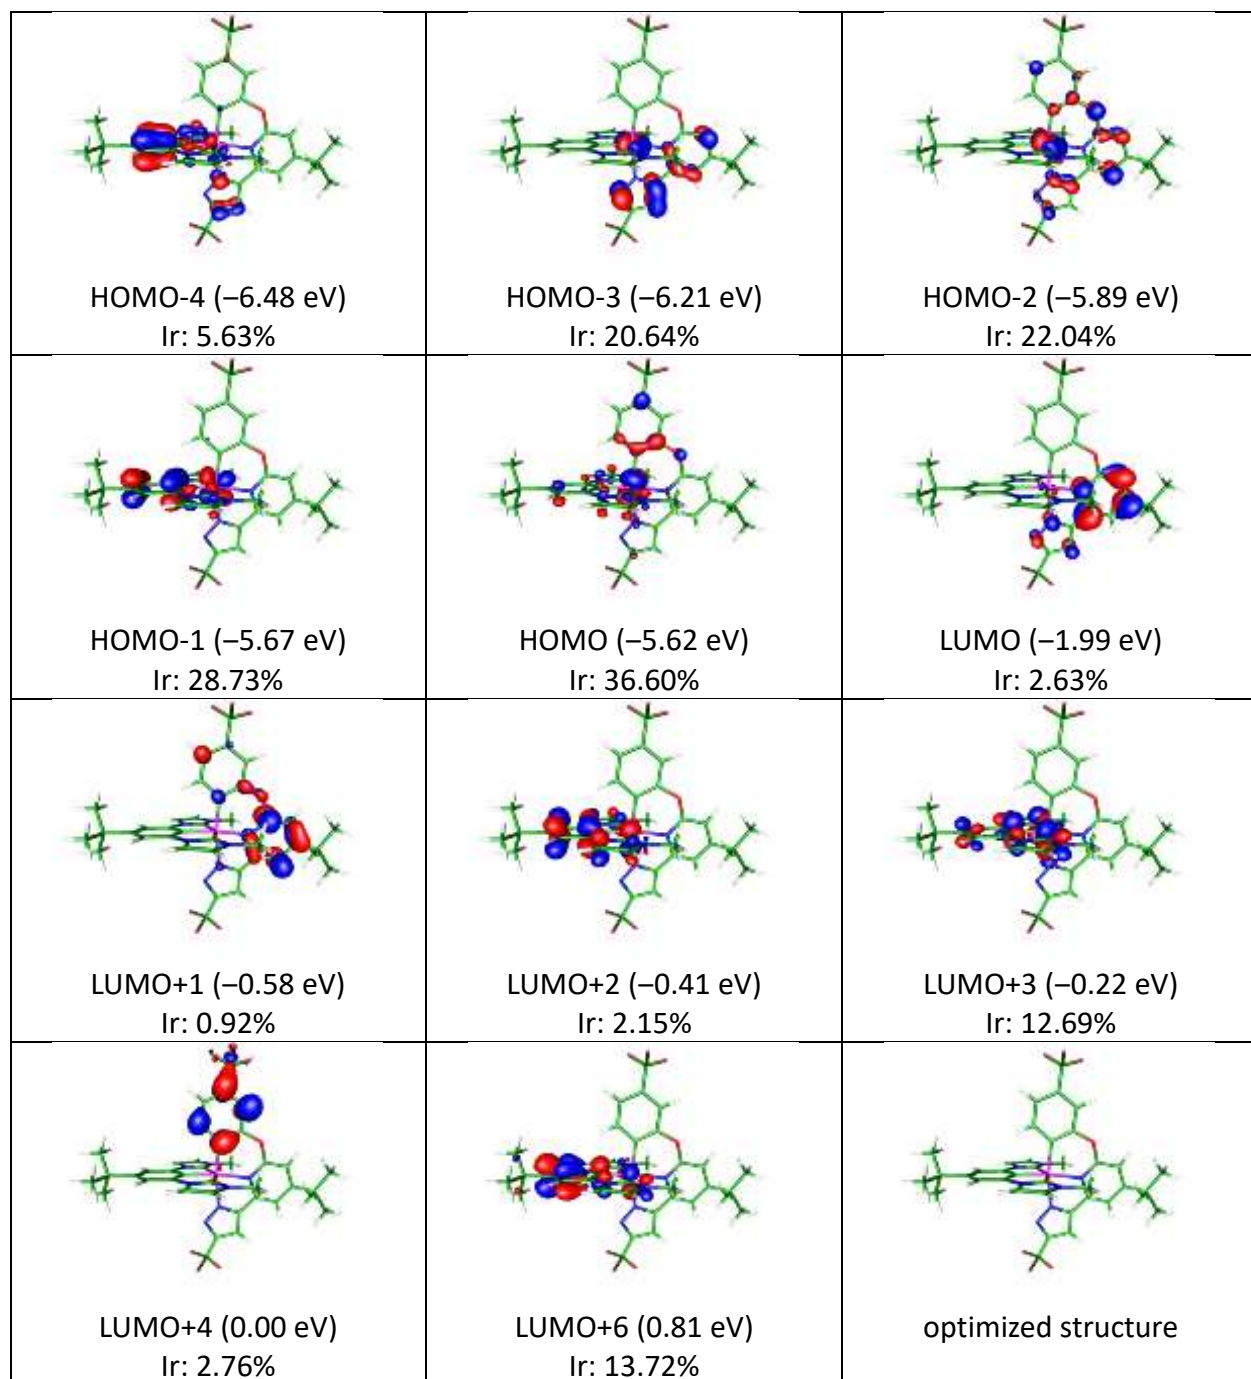

**Figure S1(a).** Frontier molecular orbitals pertinent to the absorptions for the ground state  $S_0$  of Ir(III) complex **Px-11**. The electron density distributions of Ir atom in each molecular orbital are showed. For the clarity of viewing, the optimized structure with no involvement of frontier orbitals is shown at the last figure.

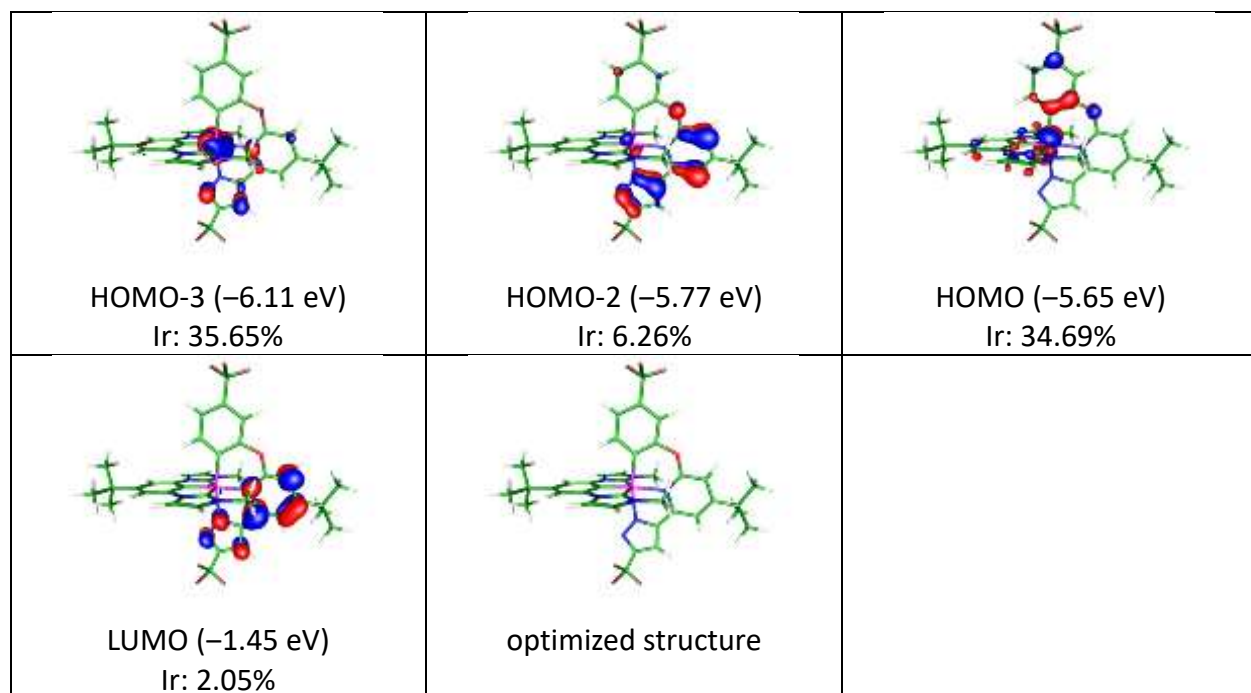

**Figure S1(b).** Frontier molecular orbitals pertinent to the emission for the excited state  $T_1$  of Ir(III) complex **Px-11**. The electron density distributions of Ir atom in each molecular orbital are showed. For the clarity of viewing, the optimized structure with no involvement of frontier orbitals is shown at the last figure.

**Table S2(a).** The calculated wavelengths, transition probabilities and charge transfer character of the optical absorptions for Ir(III) complex **Px-12** in CH<sub>2</sub>Cl<sub>2</sub>.

| State          | $\lambda$ (nm) | $f$    | Assignments                                                                  | MLCT   |
|----------------|----------------|--------|------------------------------------------------------------------------------|--------|
| T <sub>1</sub> | 418.7          | 0      | HOMO-3→LUMO(54%) HOMO-2→LUMO(20%)<br>HOMO-2→LUMO+1(10%)                      | 15.50% |
| T <sub>2</sub> | 384.9          | 0      | HOMO-1→LUMO+3(37%) HOMO-4→LUMO+2(18%)<br>HOMO→LUMO+2(16%) HOMO-1→LUMO+6(11%) | 13.52% |
| T <sub>3</sub> | 376.1          | 0      | HOMO→LUMO(25%) HOMO-2→LUMO(24%)<br>HOMO-2→LUMO+1(17%) HOMO→LUMO+1(11%)       | 20.42% |
| T <sub>4</sub> | 367.4          | 0      | HOMO→LUMO(62%) HOMO-2→LUMO(10%)<br>HOMO-4→LUMO(5%)                           | 22.90% |
| T <sub>5</sub> | 355.4          | 0      | HOMO-2→LUMO(35%) HOMO-3→LUMO(16%)<br>HOMO→LUMO+4(9%)                         | 12.60% |
| S <sub>1</sub> | 351.2          | 0.0097 | HOMO→LUMO(96%)                                                               | 32.19% |
| S <sub>2</sub> | 339            | 0.0004 | HOMO-1→LUMO(96%)                                                             | 24.88% |
| S <sub>3</sub> | 325.1          | 0.1407 | HOMO-2→LUMO(89%)                                                             | 17.17% |
| S <sub>4</sub> | 296.6          | 0.0578 | HOMO→LUMO+1(77%) HOMO-3→LUMO(16%)                                            | 29.87% |
| S <sub>5</sub> | 296.4          | 0.0054 | HOMO→LUMO+3(78%) HOMO-1→LUMO+2(10%)<br>HOMO→LUMO+2(7%)                       | 32.43% |

**Table S2(b).** The calculated wavelengths, transition probabilities and charge transfer character of the lowest emission for Ir(III) complex **Px-12** in CH<sub>2</sub>Cl<sub>2</sub>.

| State                          | $\lambda$ (nm) | $f$    | Assignments                       | MLCT   |
|--------------------------------|----------------|--------|-----------------------------------|--------|
| T <sub>1</sub> →S <sub>0</sub> | 561.9          | 0      | LUMO→HOMO-2(74%) LUMO→HOMO-3(18%) | 8.39%  |
| S <sub>1</sub> →S <sub>0</sub> | 445.3          | 0.0138 | LUMO→HOMO(99%)                    | 29.90% |



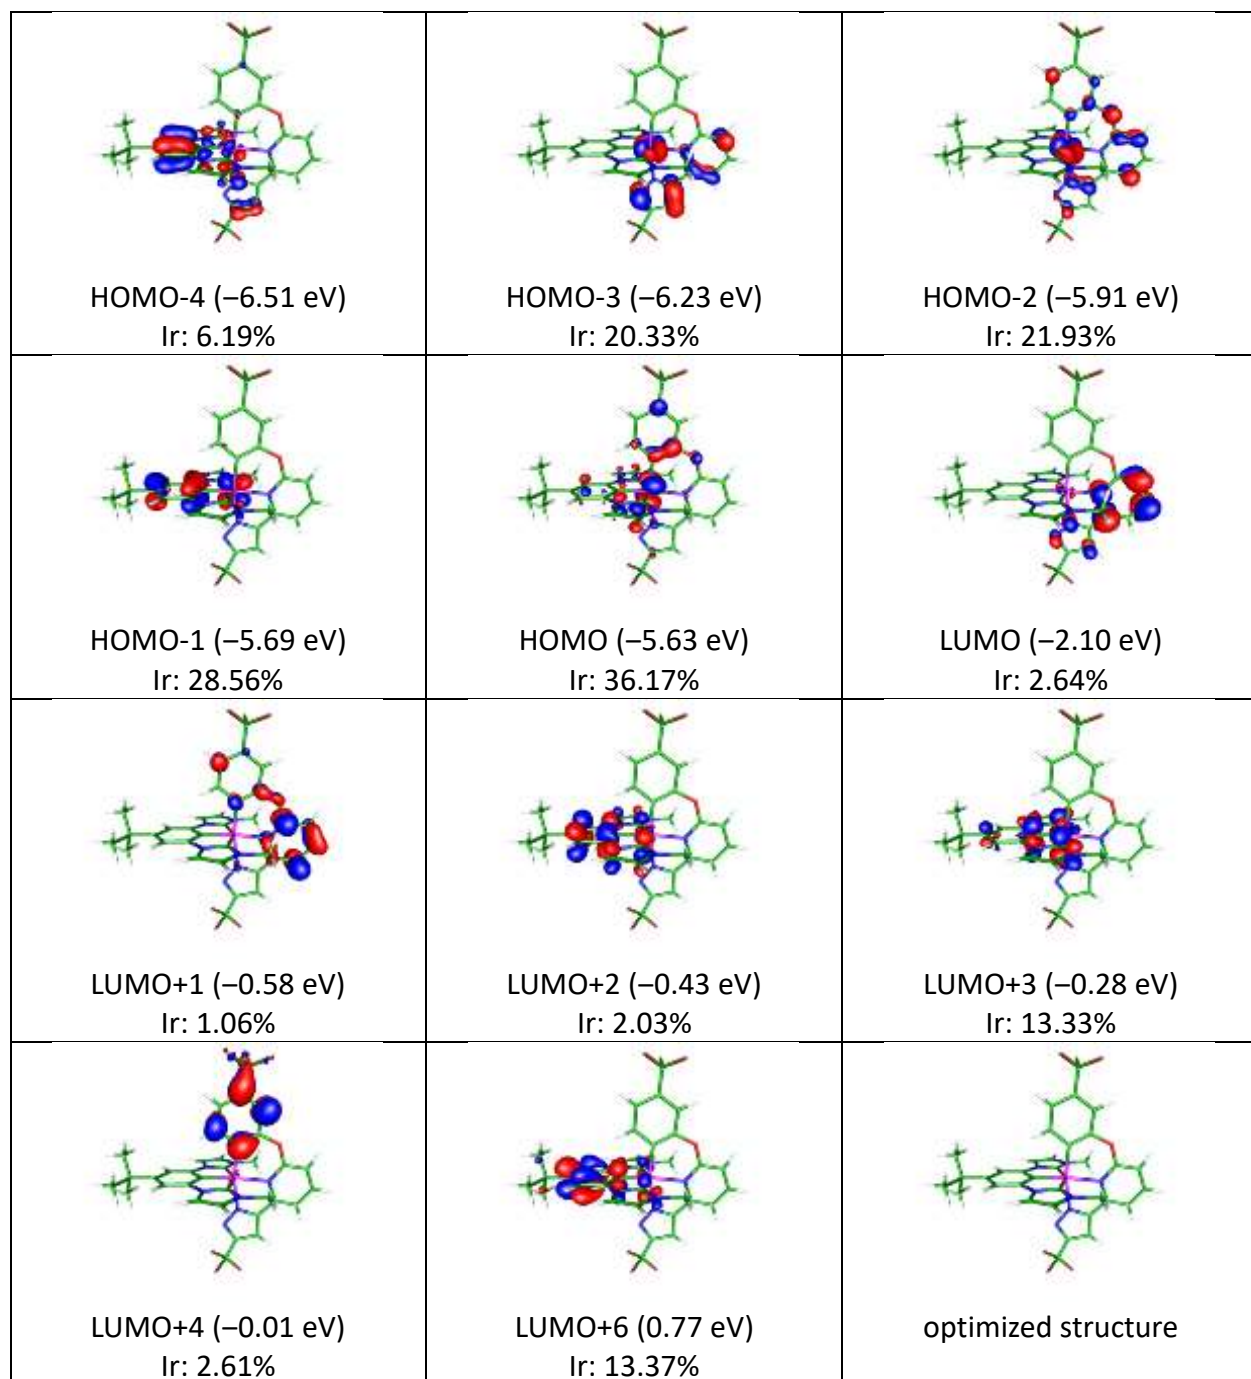

**Figure S2(a).** Frontier molecular orbitals pertinent to the absorptions for the ground state  $S_0$  of Ir(III) complex **Px-12**. The electron density distributions of Ir atom in each molecular orbital are showed. For the clarity of viewing, the optimized structure with no involvement of frontier orbitals is shown at the last figure.

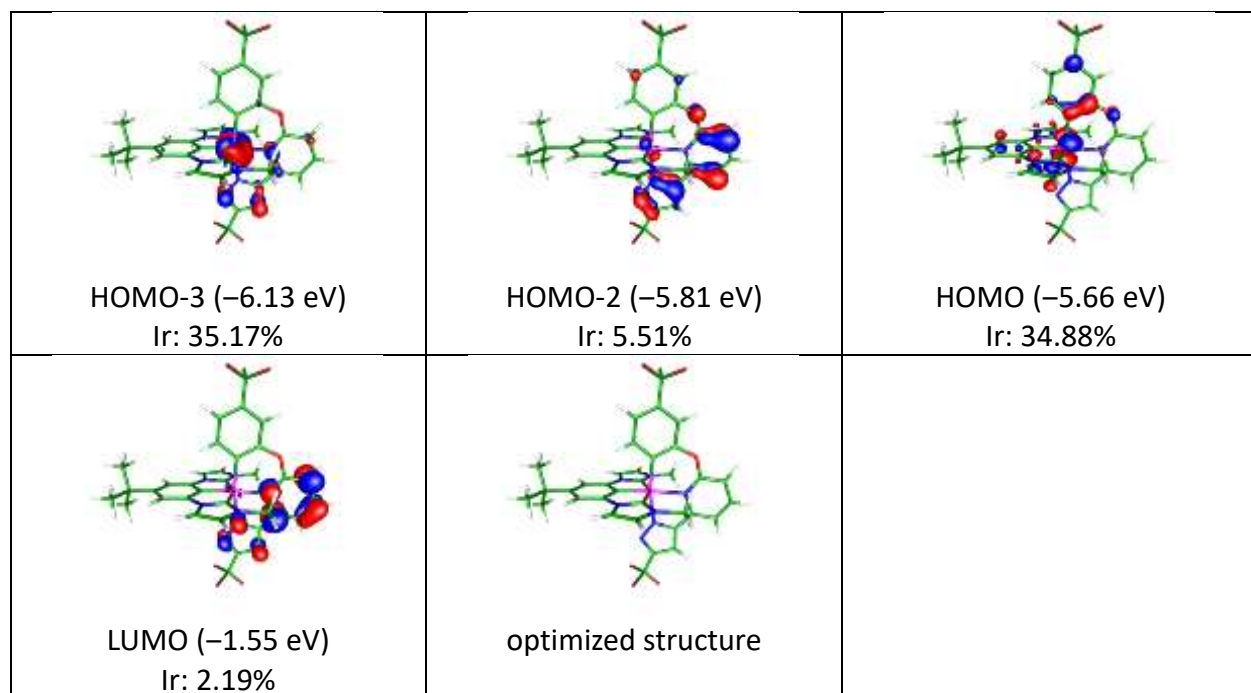

**Figure S2(b).** Frontier molecular orbitals pertinent to the emission for the excited state  $T_1$  of Ir(III) complex **Px-12**. The electron density distributions of Ir atom in each molecular orbital are showed. For the clarity of viewing, the optimized structure with no involvement of frontier orbitals is shown at the last figure.

**Table S3(a).** The calculated wavelengths, transition probabilities and charge transfer character of the optical absorptions for Ir(III) complex **Px-13** in CH<sub>2</sub>Cl<sub>2</sub>.

| State          | $\lambda$ (nm) | $f$    | Assignments                                                                                                 | MLCT   |
|----------------|----------------|--------|-------------------------------------------------------------------------------------------------------------|--------|
| T <sub>1</sub> | 409.7          | 0      | HOMO-3→LUMO(49%) HOMO-2→LUMO+1(17%)<br>HOMO-2→LUMO(14%) HOMO-3→LUMO+1(7%)                                   | 12.04% |
| T <sub>2</sub> | 384            | 0      | HOMO-1→LUMO+3(34%) HOMO-4→LUMO+2(18%)<br>HOMO→LUMO+2(11%) HOMO-1→LUMO+6(11%)<br>HOMO-1→LUMO+2(10%)          | 14.17% |
| T <sub>3</sub> | 375.5          | 0      | HOMO-2→LUMO(28%) HOMO-2→LUMO+1(16%)<br>HOMO→LUMO+1(14%) HOMO→LUMO(13%)<br>HOMO-6→LUMO+4(7%) HOMO→LUMO+5(6%) | 20.98% |
| T <sub>4</sub> | 360.5          | 0      | HOMO→LUMO(75%) HOMO-2→LUMO(6%)                                                                              | 27.28% |
| T <sub>5</sub> | 350.4          | 0      | HOMO-2→LUMO(40%) HOMO-3→LUMO(12%)<br>HOMO→LUMO+5(8%) HOMO-6→LUMO+4(7%)                                      | 12.92% |
| S <sub>1</sub> | 344.5          | 0.0105 | HOMO→LUMO(97%)                                                                                              | 33.72% |
| S <sub>2</sub> | 333            | 0.0035 | HOMO-1→LUMO(98%)                                                                                            | 25.11% |
| S <sub>3</sub> | 320.4          | 0.1571 | HOMO-2→LUMO(87%) HOMO→LUMO+1(5%)                                                                            | 19.43% |
| S <sub>4</sub> | 302            | 0.0543 | HOMO→LUMO+1(90%)                                                                                            | 33.02% |
| S <sub>5</sub> | 294.9          | 0.0069 | HOMO→LUMO+3(63%) HOMO-1→LUMO+2(18%)<br>HOMO→LUMO+2(11%)                                                     | 24.21% |

**Table S3(b).** The calculated wavelengths, transition probabilities and charge transfer character of the lowest emission for Ir(III) complex **Px-13** in CH<sub>2</sub>Cl<sub>2</sub>.

| State                          | $\lambda$ (nm) | $f$    | Assignments                       | MLCT   |
|--------------------------------|----------------|--------|-----------------------------------|--------|
| T <sub>1</sub> →S <sub>0</sub> | 545.8          | 0      | LUMO→HOMO-2(76%) LUMO→HOMO-3(16%) | 7.55%  |
| S <sub>1</sub> →S <sub>0</sub> | 437            | 0.0122 | LUMO→HOMO(99%)                    | 30.75% |

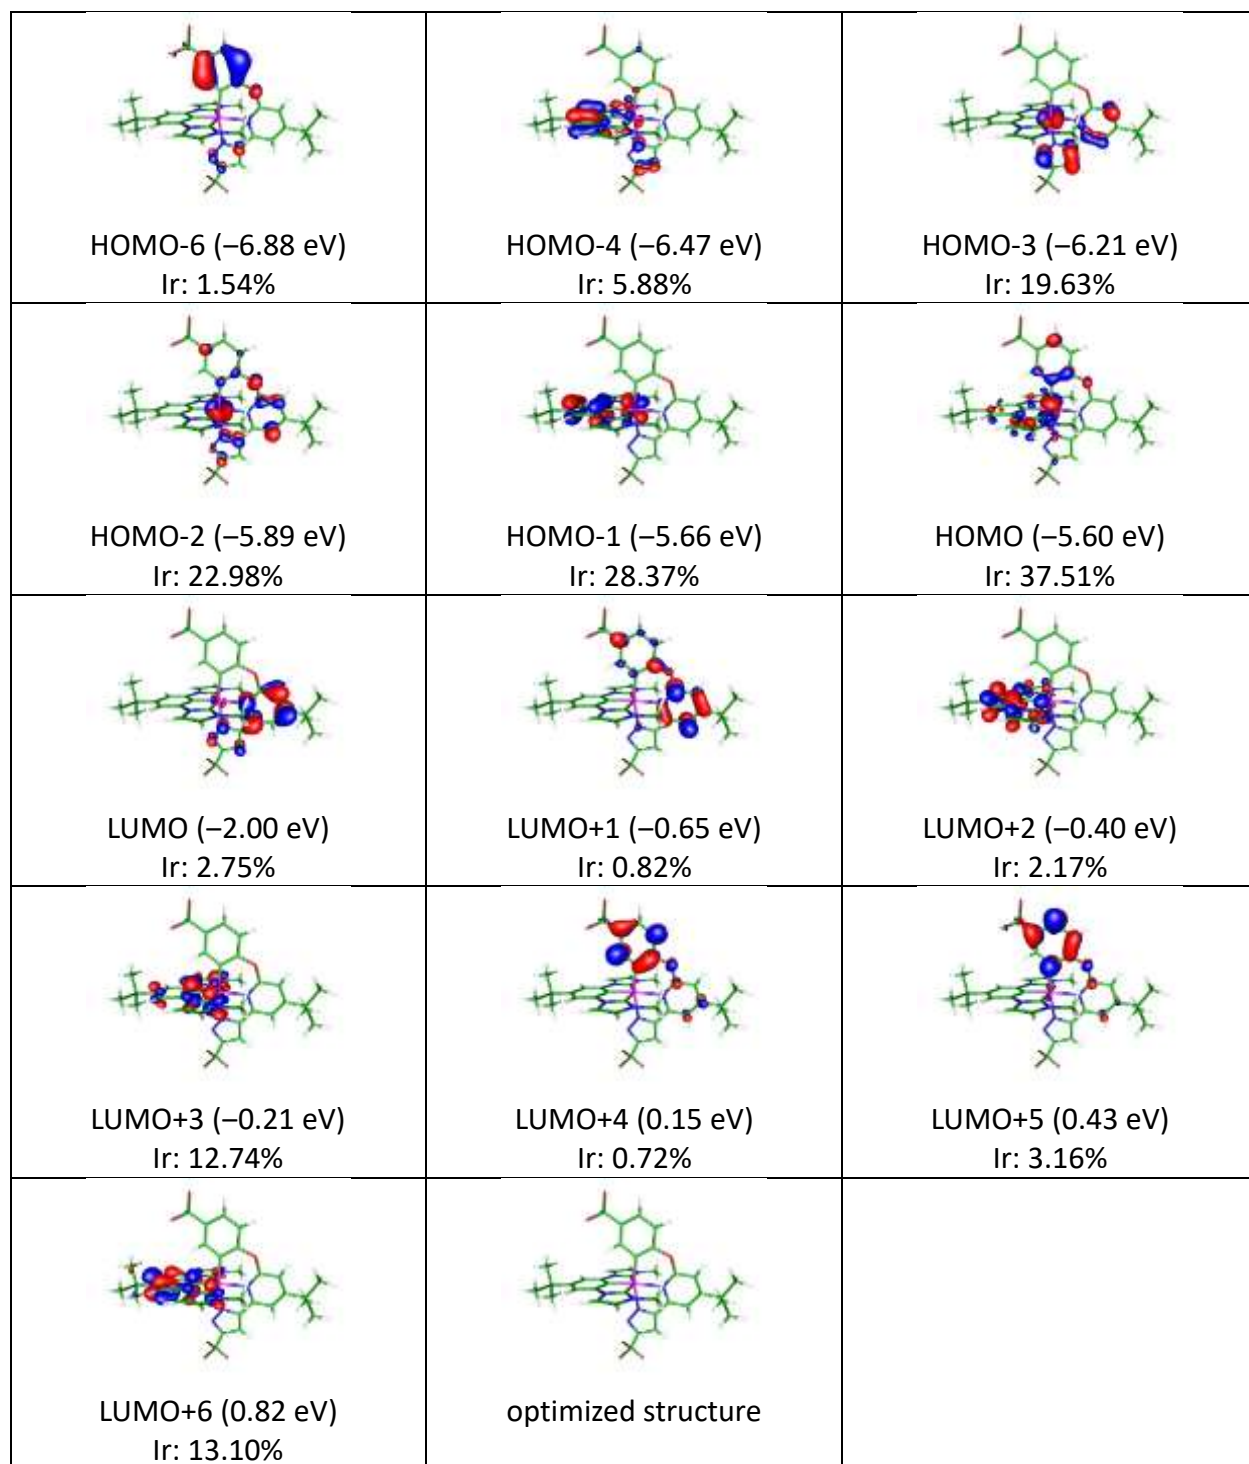

**Figure S3(a).** Frontier molecular orbitals pertinent to the absorptions for the ground state  $S_0$  of Ir(III) complex **Px-13**. The electron density distributions of Ir atom in each molecular orbital are showed. For the clarity of viewing, the optimized structure with no involvement of frontier orbitals is shown at the last figure.

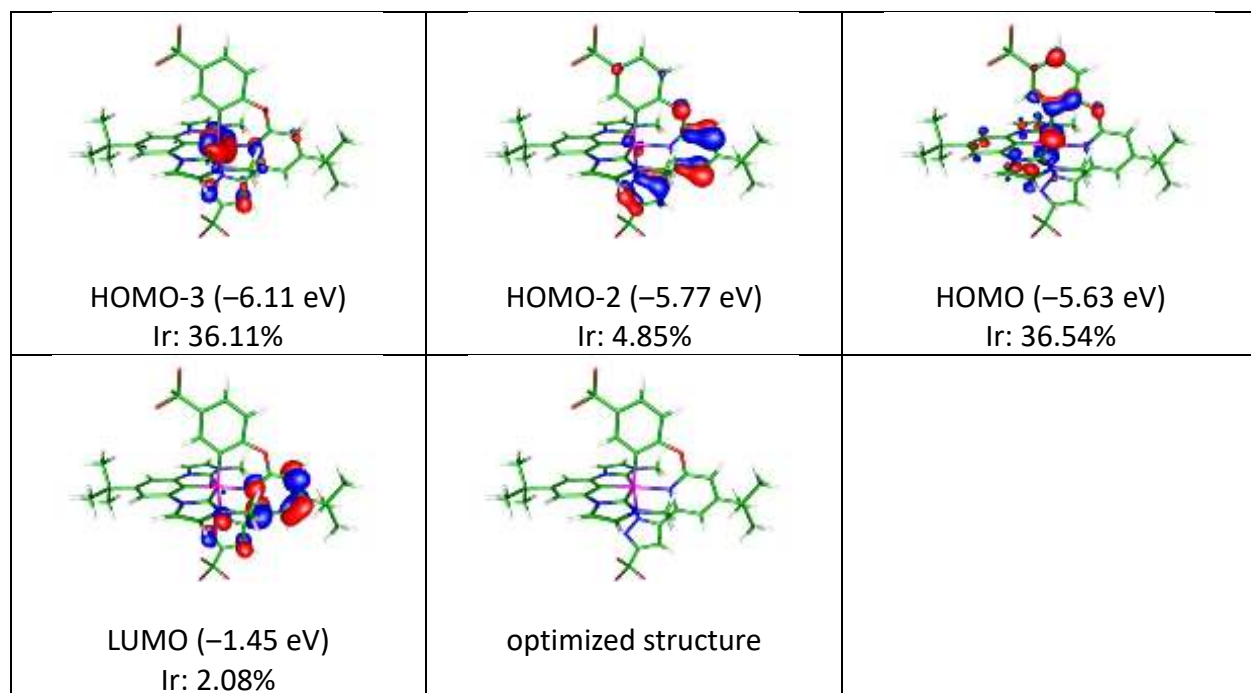

**Figure S3(b).** Frontier molecular orbitals pertinent to the emission for the excited state  $T_1$  of Ir(III) complex **Px-13**. The electron density distributions of Ir atom in each molecular orbital are showed. For the clarity of viewing, the optimized structure with no involvement of frontier orbitals is shown at the last figure.

**Table S4(a).** The calculated wavelengths, transition probabilities and charge transfer character of the optical absorptions for Ir(III) complex **Px-14** in CH<sub>2</sub>Cl<sub>2</sub>.

| State          | $\lambda$ (nm) | $f$    | Assignments                                                                                               | MLCT   |
|----------------|----------------|--------|-----------------------------------------------------------------------------------------------------------|--------|
| T <sub>1</sub> | 417            | 0      | HOMO-3→LUMO(56%) HOMO-2→LUMO(15%)<br>HOMO-2→LUMO+1(12%) HOMO-3→LUMO+1(6%)                                 | 15.46% |
| T <sub>2</sub> | 384.1          | 0      | HOMO-1→LUMO+3(32%) HOMO-4→LUMO+2(18%)<br>HOMO-1→LUMO+2(12%) HOMO-1→LUMO+6(10%)<br>HOMO→LUMO+2(9%)         | 13.53% |
| T <sub>3</sub> | 379            | 0      | HOMO→LUMO(34%) HOMO-2→LUMO(22%)<br>HOMO-2→LUMO+1(14%) HOMO→LUMO+1(10%)                                    | 23.02% |
| T <sub>4</sub> | 370.2          | 0      | HOMO→LUMO(52%) HOMO-2→LUMO(18%)<br>HOMO-4→LUMO(6%)                                                        | 21.86% |
| T <sub>5</sub> | 355.3          | 0      | HOMO-2→LUMO(29%) HOMO-3→LUMO(11%)<br>HOMO→LUMO+5(9%) HOMO-6→LUMO+4(8%)<br>HOMO→LUMO+1(7%) HOMO-1→LUMO(6%) | 14.81% |
| S <sub>1</sub> | 354.8          | 0.0093 | HOMO→LUMO(97%)                                                                                            | 33.48% |
| S <sub>2</sub> | 342.5          | 0.0036 | HOMO-1→LUMO(98%)                                                                                          | 24.86% |
| S <sub>3</sub> | 324.9          | 0.132  | HOMO-2→LUMO(89%)                                                                                          | 18.21% |
| S <sub>4</sub> | 301.8          | 0.0429 | HOMO→LUMO+1(89%)                                                                                          | 32.44% |
| S <sub>5</sub> | 296.2          | 0.1747 | HOMO-3→LUMO(84%)                                                                                          | 12.99% |

**Table S4(b).** The calculated wavelengths, transition probabilities and charge transfer character of the lowest emission for Ir(III) complex **Px-14** in CH<sub>2</sub>Cl<sub>2</sub>.

| State                          | $\lambda$ (nm) | $f$   | Assignments                       | MLCT   |
|--------------------------------|----------------|-------|-----------------------------------|--------|
| T <sub>1</sub> →S <sub>0</sub> | 559.7          | 0     | LUMO→HOMO-2(75%) LUMO→HOMO-3(18%) | 7.67%  |
| S <sub>1</sub> →S <sub>0</sub> | 451.3          | 0.107 | LUMO→HOMO(99%)                    | 30.52% |

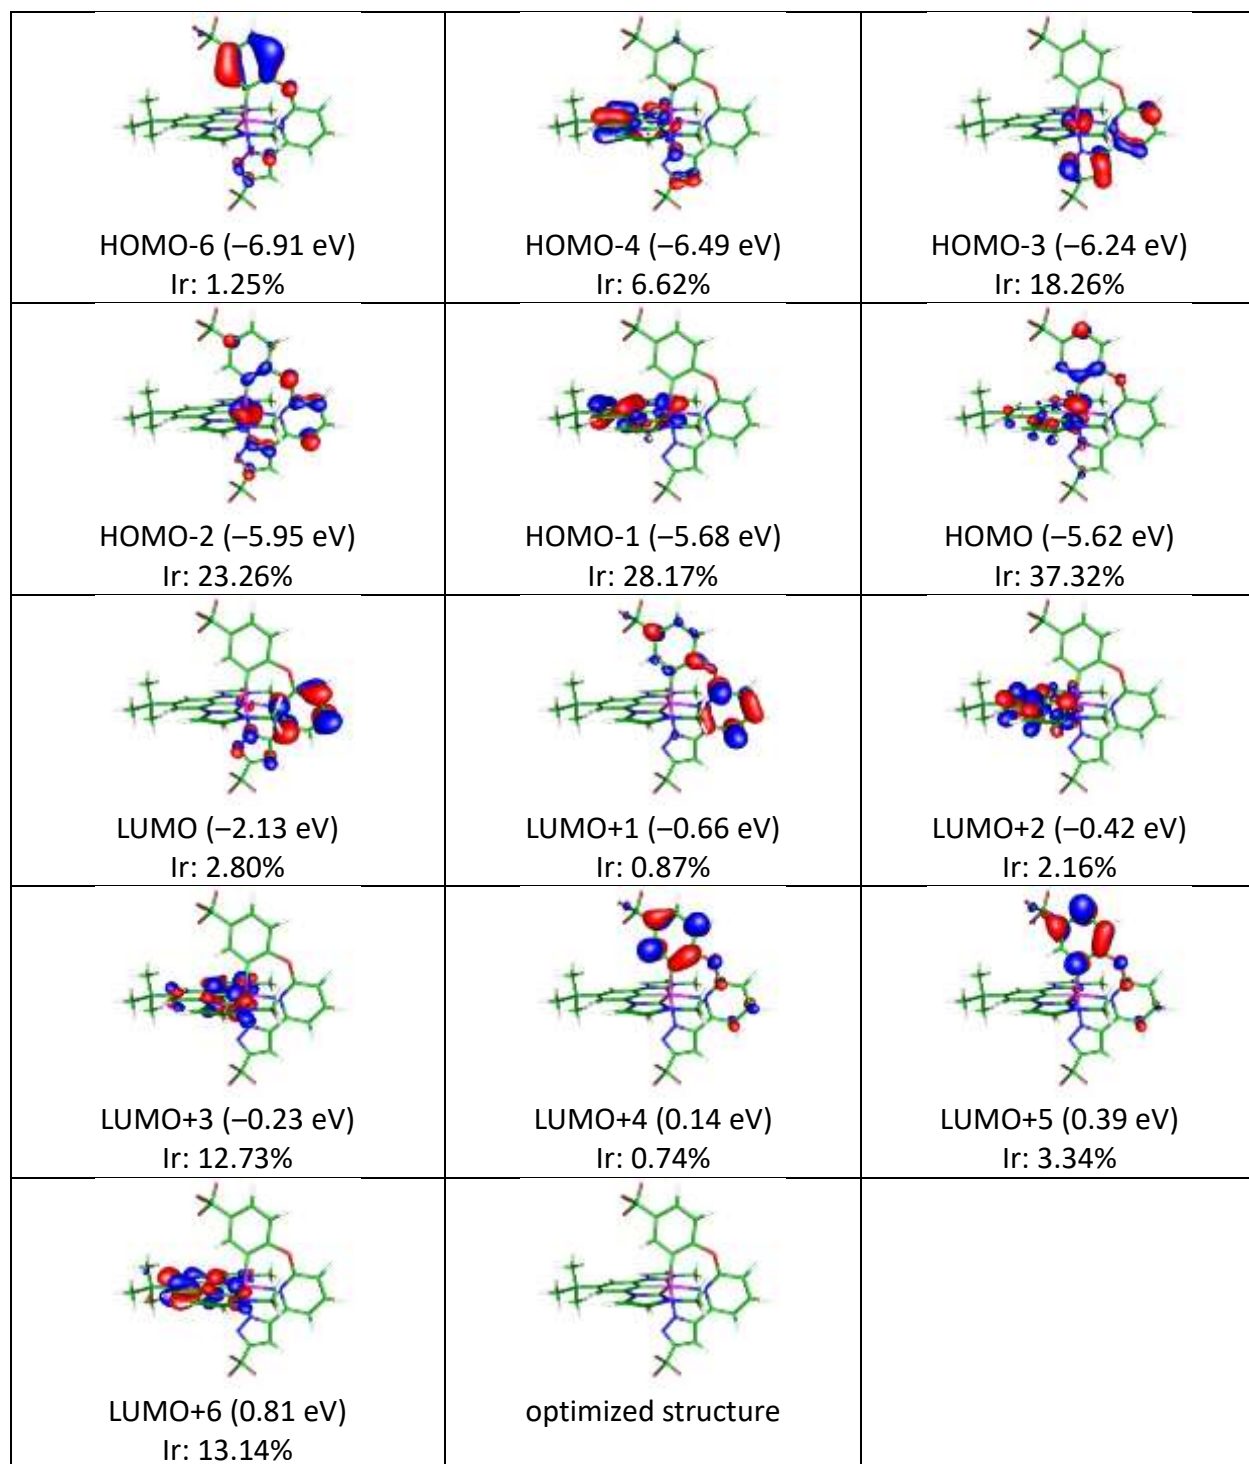

**Figure S4(a).** Frontier molecular orbitals pertinent to the absorptions for the ground state  $S_0$  of Ir(III) complex **Px-14**. The electron density distributions of Ir atom in each molecular orbital are showed. For the clarity of viewing, the optimized structure with no involvement of frontier orbitals is shown at the last figure.

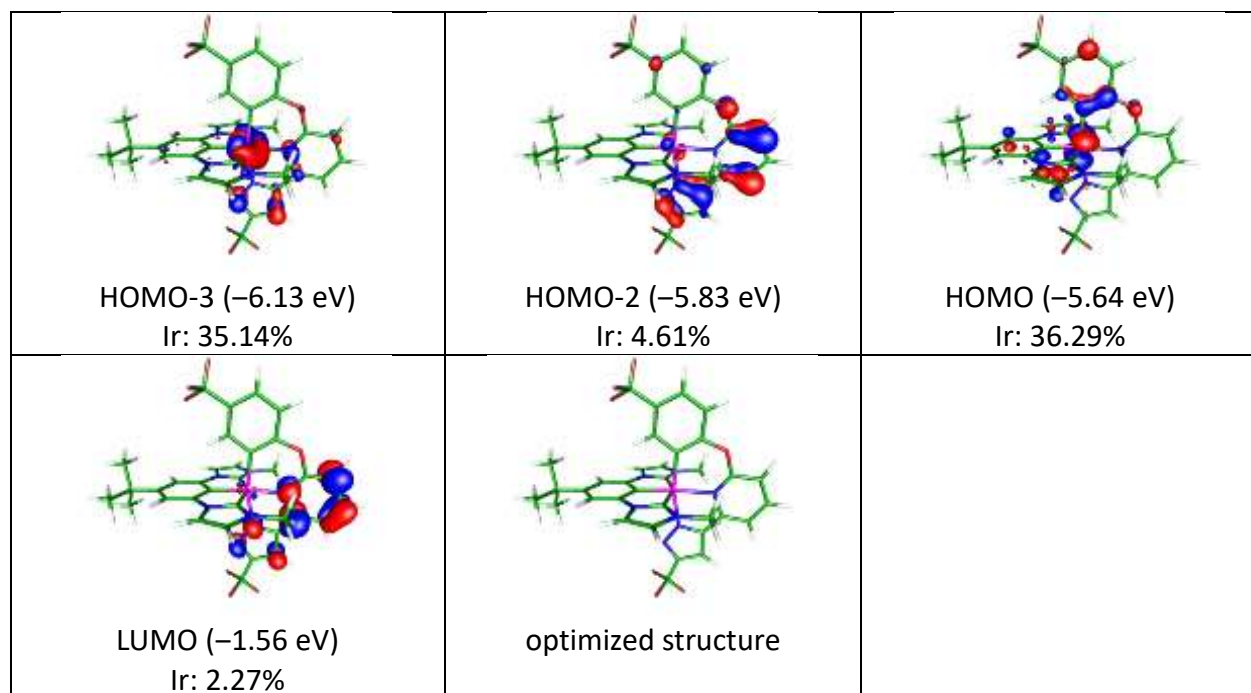

**Figure S4(b).** Frontier molecular orbitals pertinent to the emission for the excited state  $T_1$  of Ir(III) complex **Px-14**. The electron density distributions of Ir atom in each molecular orbital are showed. For the clarity of viewing, the optimized structure with no involvement of frontier orbitals is shown at the last figure.



**Table S5(a).** The calculated wavelengths, transition probabilities and charge transfer character of the optical absorptions for Ir(III) complex **Px-15** in CH<sub>2</sub>Cl<sub>2</sub>.

| State          | $\lambda$ (nm) | $f$    | Assignments                                                                               | MLCT   |
|----------------|----------------|--------|-------------------------------------------------------------------------------------------|--------|
| T <sub>1</sub> | 418.7          | 0      | HOMO-3→LUMO(55%) HOMO-2→LUMO(16%)<br>HOMO-2→LUMO+1(12%) HOMO-3→LUMO+1(6%)                 | 15.40% |
| T <sub>2</sub> | 383.5          | 0      | HOMO-1→LUMO+3(36%) HOMO-4→LUMO+2(18%)<br>HOMO→LUMO+2(16%) HOMO-1→LUMO+6(9%)               | 13.97% |
| T <sub>3</sub> | 381.8          | 0      | HOMO→LUMO(32%) HOMO-2→LUMO(22%)<br>HOMO-2→LUMO+1(15%) HOMO→LUMO+1(8%)                     | 21.40% |
| T <sub>4</sub> | 372.3          | 0      | HOMO→LUMO(51%) HOMO-2→LUMO(19%)<br>HOMO-4→LUMO(6%)                                        | 21.38% |
| S <sub>1</sub> | 356.8          | 0.0105 | HOMO→LUMO(95%)                                                                            | 32.21% |
| T <sub>5</sub> | 355.1          | 0      | HOMO-2→LUMO(33%) HOMO-3→LUMO(14%)<br>HOMO-6→LUMO+4(8%) HOMO→LUMO+5(8%)<br>HOMO→LUMO+1(6%) | 13.65% |
| S <sub>2</sub> | 345.2          | 0.0002 | HOMO-1→LUMO(95%)                                                                          | 24.57% |
| S <sub>3</sub> | 326.9          | 0.1229 | HOMO-2→LUMO(88%)                                                                          | 17.56% |
| S <sub>4</sub> | 303.7          | 0.0428 | HOMO→LUMO+1(87%)                                                                          | 31.22% |
| S <sub>5</sub> | 296.9          | 0.1742 | HOMO-3→LUMO(87%)                                                                          | 13.49% |

**Table S5(b).** The calculated wavelengths, transition probabilities and charge transfer character of the lowest emission for Ir(III) complex **Px-15** in CH<sub>2</sub>Cl<sub>2</sub>.

| State                          | $\lambda$ (nm) | $f$    | Assignments                       | MLCT   |
|--------------------------------|----------------|--------|-----------------------------------|--------|
| T <sub>1</sub> →S <sub>0</sub> | 557.3          | 0      | LUMO→HOMO-2(74%) LUMO→HOMO-3(18%) | 7.30%  |
| S <sub>1</sub> →S <sub>0</sub> | 454.8          | 0.0101 | LUMO→HOMO(99%)                    | 30.87% |

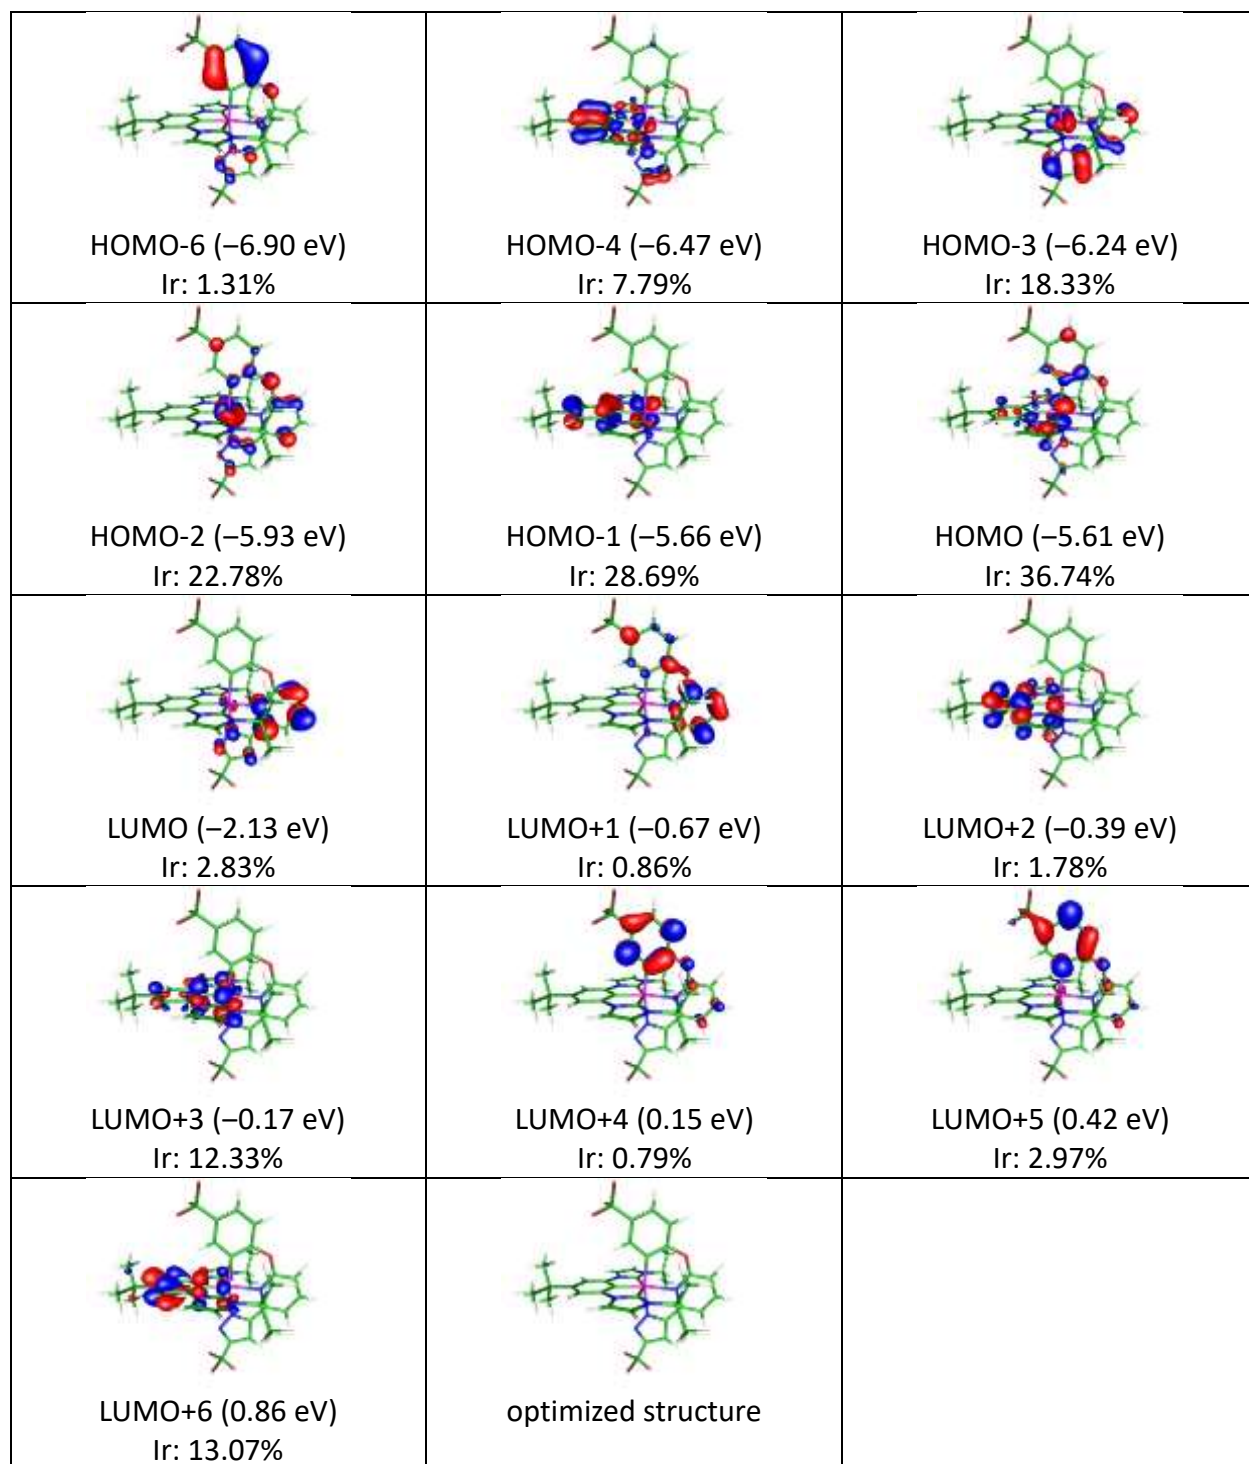

**Figure S5(a).** Frontier molecular orbitals pertinent to the absorptions for the ground state  $S_0$  of Ir(III) complex **Px-15**. The electron density distributions of Ir atom in each molecular orbital are showed. For the clarity of viewing, the optimized structure with no involvement of frontier orbitals is shown at the last figure.

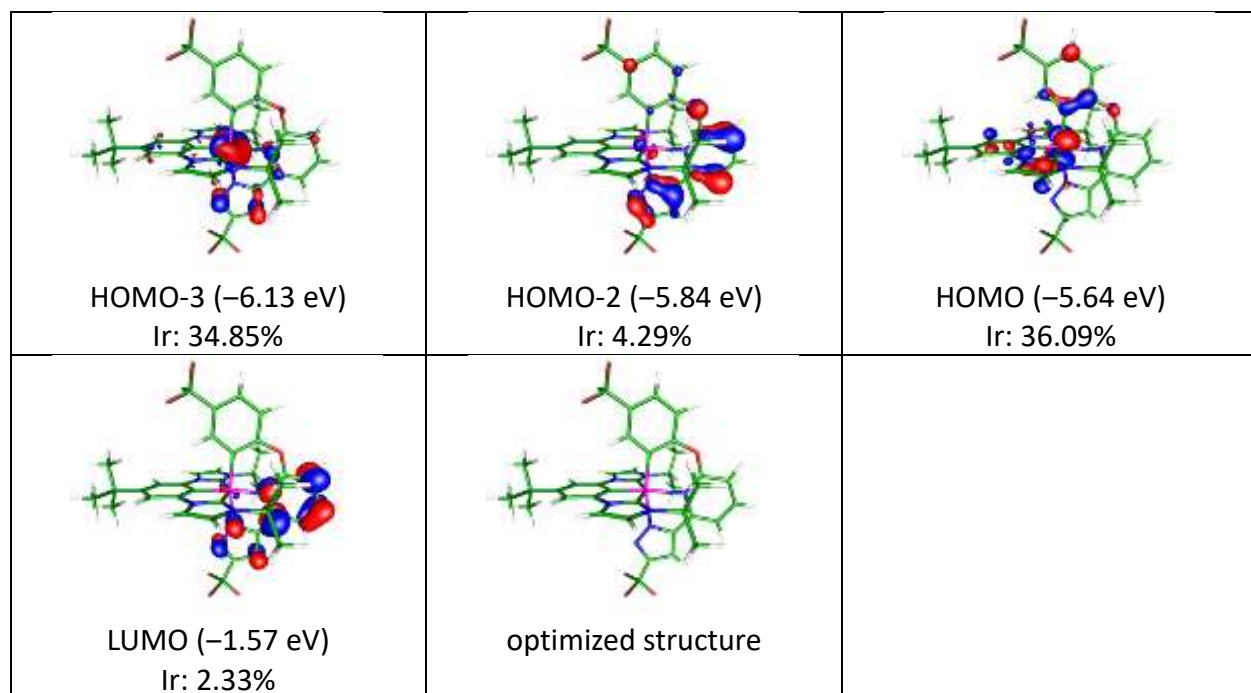

**Figure S5(b).** Frontier molecular orbitals pertinent to the emission for the excited state  $T_1$  of Ir(III) complex **Px-15**. The electron density distributions of Ir atom in each molecular orbital are showed. For the clarity of viewing, the optimized structure with no involvement of frontier orbitals is shown at the last figure.

**Table S6(a).** The calculated wavelengths, transition probabilities and charge transfer character of the optical absorptions for Ir(III) complex **Px-16** in CH<sub>2</sub>Cl<sub>2</sub>.

| State          | $\lambda$ (nm) | $f$    | Assignments                                                                  | MLCT   |
|----------------|----------------|--------|------------------------------------------------------------------------------|--------|
| T <sub>1</sub> | 418            | 0      | HOMO-3→LUMO(52%) HOMO-2→LUMO(19%)<br>HOMO-2→LUMO+1(12%) HOMO-3→LUMO+1(5%)    | 15.23% |
| T <sub>2</sub> | 384            | 0      | HOMO-1→LUMO+3(21%) HOMO-4→LUMO+2(16%)<br>HOMO→LUMO+2(14%) HOMO-1→LUMO+5(10%) | 12.57% |
| T <sub>3</sub> | 380.6          | 0      | HOMO→LUMO(29%) HOMO-2→LUMO(22%)<br>HOMO-2→LUMO+1(17%) HOMO→LUMO+1(10%)       | 20.92% |
| T <sub>4</sub> | 370.1          | 0      | HOMO→LUMO(58%) HOMO-2→LUMO(16%)<br>HOMO-4→LUMO(6%)                           | 22.91% |
| S <sub>1</sub> | 354.1          | 0.0119 | HOMO→LUMO(95%)                                                               | 32.12% |
| T <sub>5</sub> | 353.6          | 0      | HOMO-2→LUMO(32%) HOMO-3→LUMO(14%)<br>HOMO→LUMO+1(6%)                         | 10.32% |
| S <sub>2</sub> | 344            | 0.0005 | HOMO-1→LUMO(96%)                                                             | 24.02% |
| S <sub>3</sub> | 325.5          | 0.1241 | HOMO-2→LUMO(88%)                                                             | 16.29% |
| S <sub>4</sub> | 301.4          | 0.0442 | HOMO→LUMO+1(87%)                                                             | 31.07% |
| S <sub>5</sub> | 295.9          | 0.1496 | HOMO-3→LUMO(86%)                                                             | 13.83% |

**Table S6(b).** The calculated wavelengths, transition probabilities and charge transfer character of the lowest emission for Ir(III) complex **Px-16** in CH<sub>2</sub>Cl<sub>2</sub>.

| State                          | $\lambda$ (nm) | $f$    | Assignments                       | MLCT   |
|--------------------------------|----------------|--------|-----------------------------------|--------|
| T <sub>1</sub> →S <sub>0</sub> | 558.9          | 0      | LUMO→HOMO-2(75%) LUMO→HOMO-3(18%) | 7.30%  |
| S <sub>1</sub> →S <sub>0</sub> | 453.7          | 0.0114 | LUMO→HOMO(99%)                    | 30.26% |

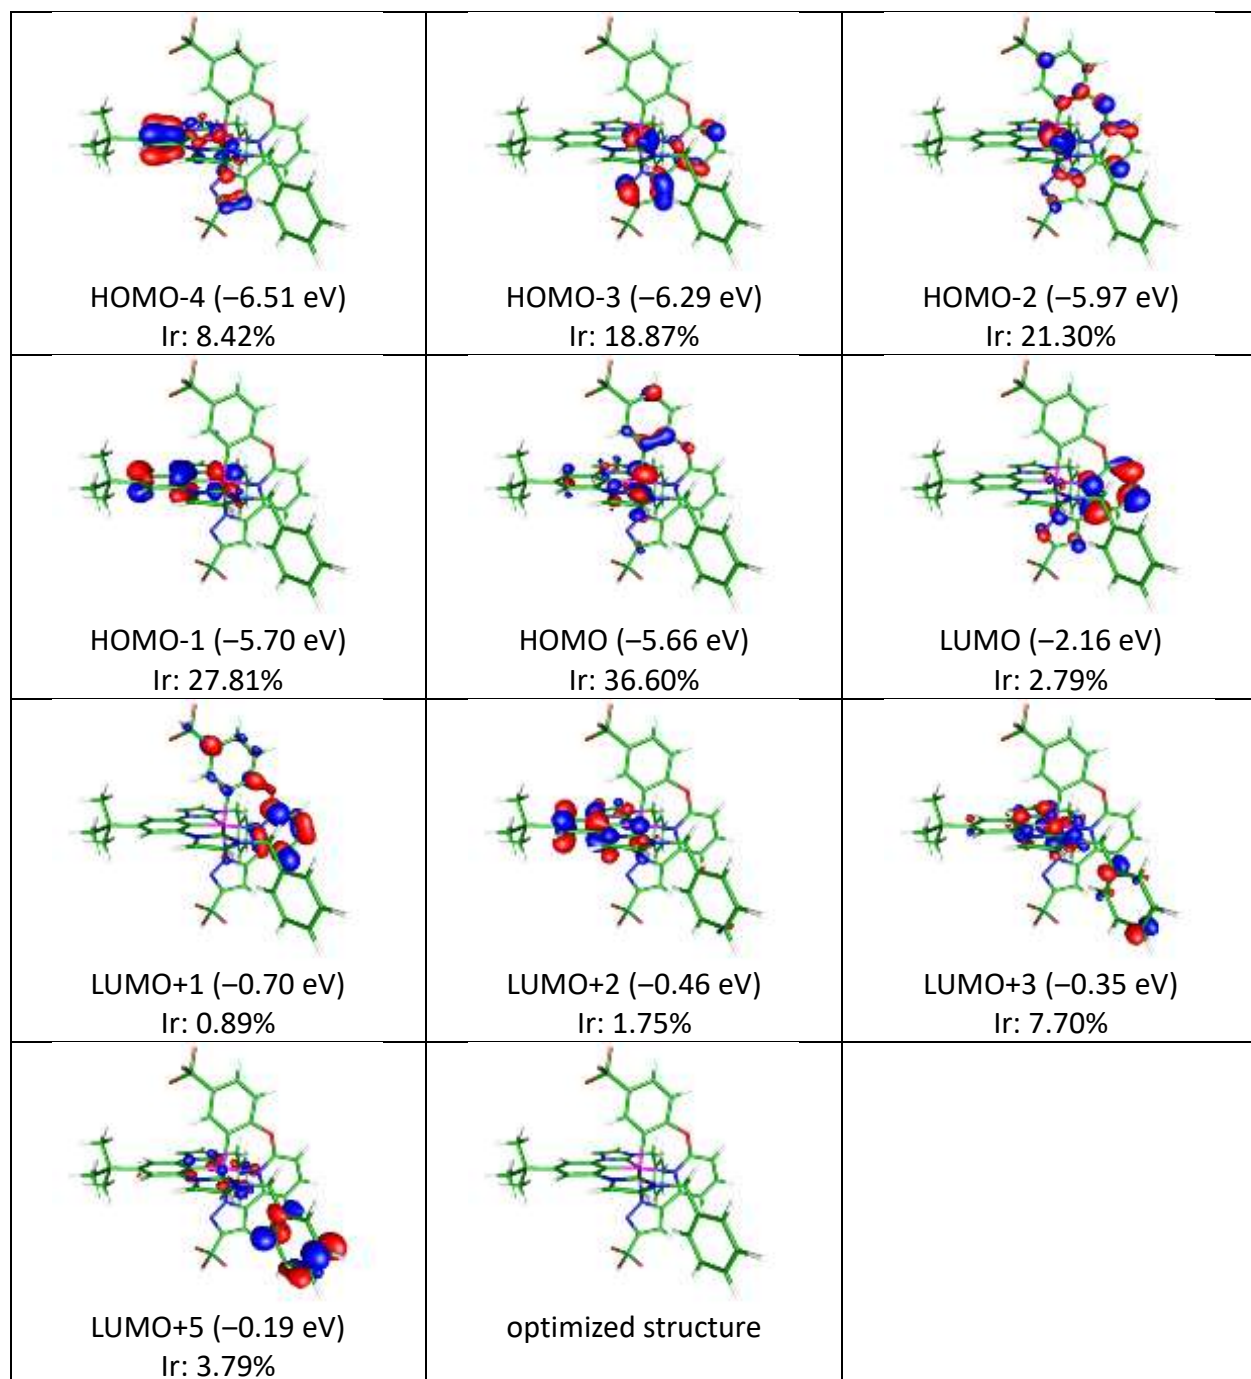

**Figure S6(a).** Frontier molecular orbitals pertinent to the absorptions for the ground state  $S_0$  of Ir(III) complex **Px-16**. The electron density distributions of Ir atom in each molecular orbital are showed. For the clarity of viewing, the optimized structure with no involvement of frontier orbitals is shown at the last figure.

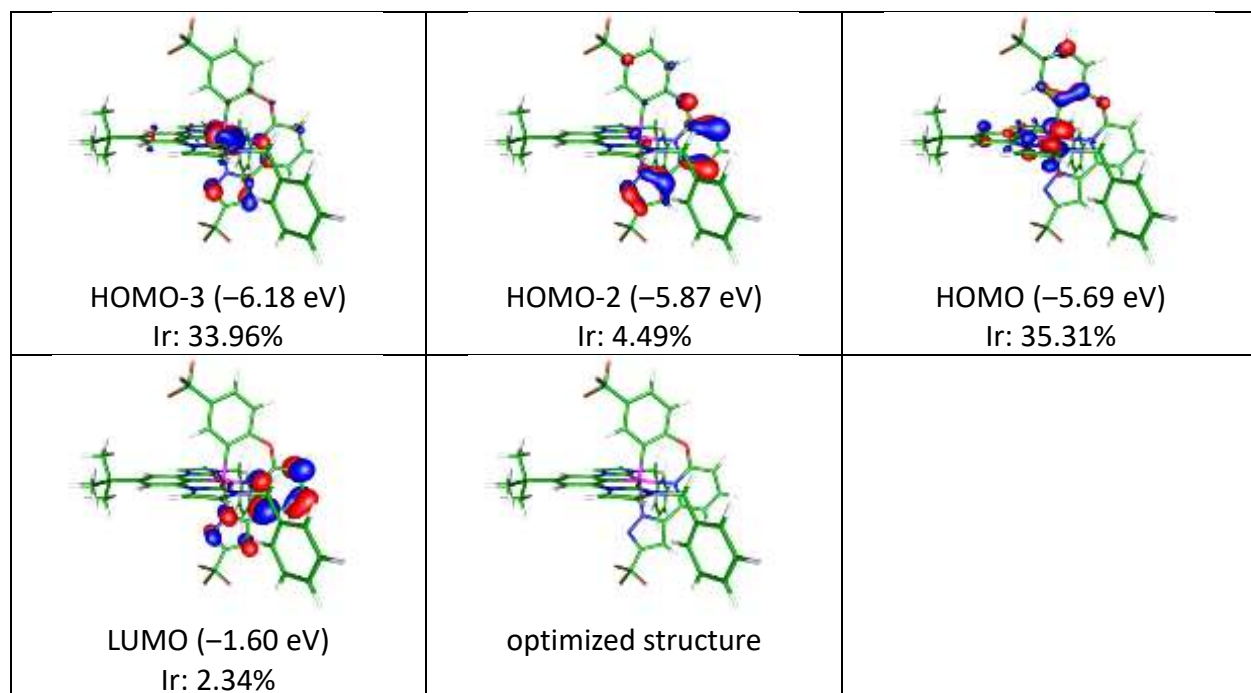

**Figure S6(b).** Frontier molecular orbitals pertinent to the emission for the excited state  $T_1$  of Ir(III) complex **Px-16**. The electron density distributions of Ir atom in each molecular orbital are showed. For the clarity of viewing, the optimized structure with no involvement of frontier orbitals is shown at the last figure.

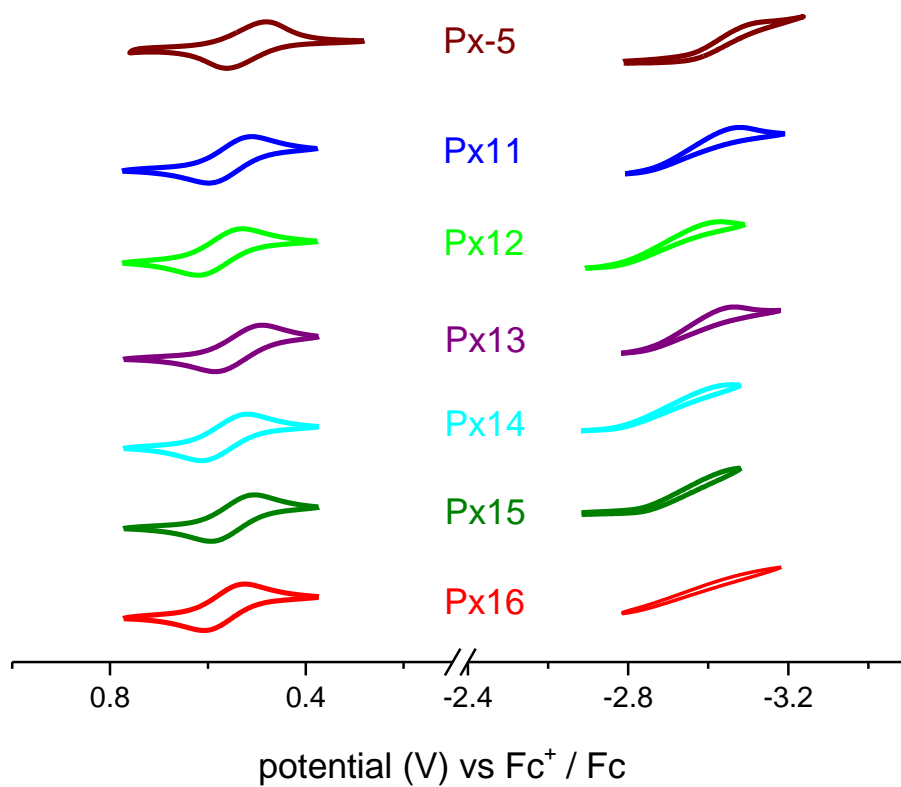

**Figure S7.** Cyclic voltammetry measurement of the Ir(III) phosphors **Px-11 – 16** for this work.

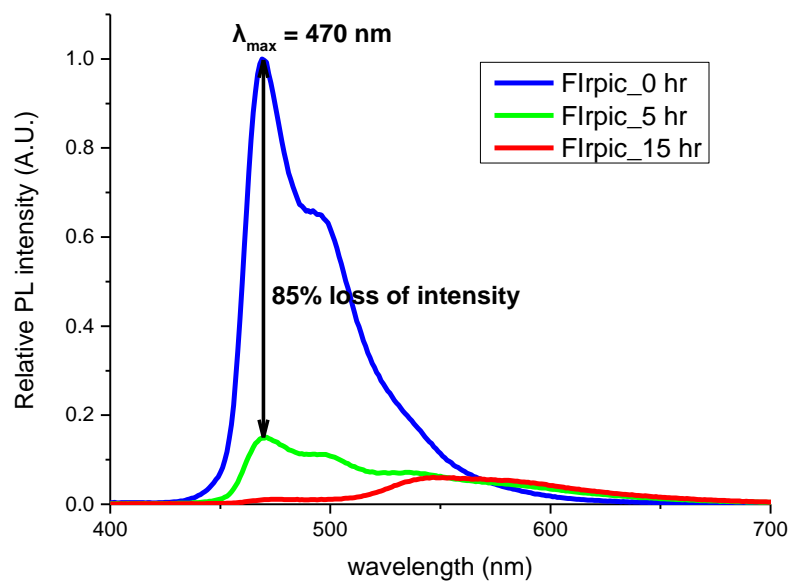

**Figure S8.** The photo-degradation response of sky-blue emitter, Flrpc, for a period of 15 hrs in degassed toluene.



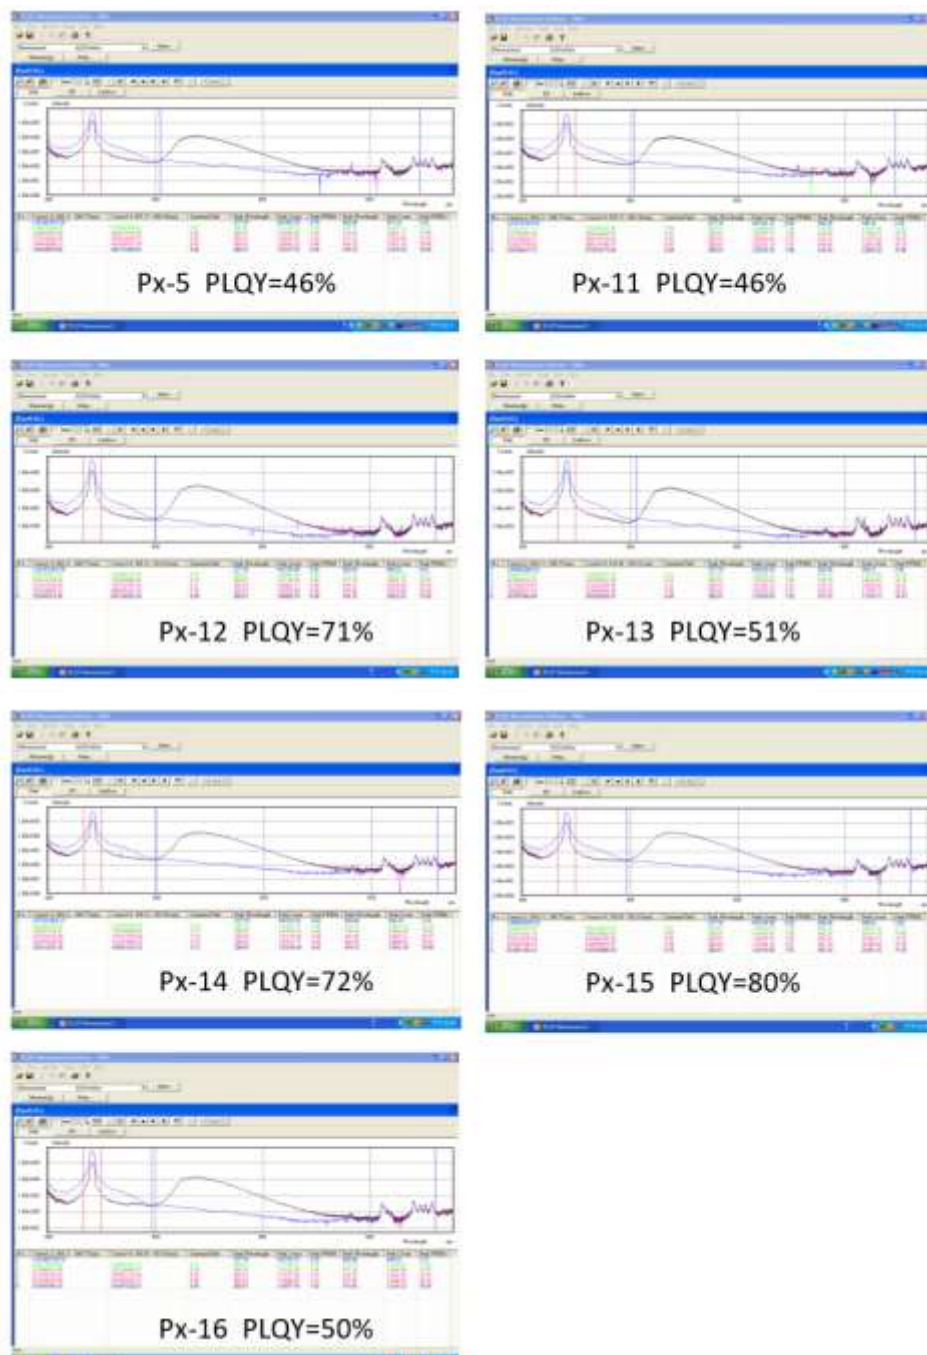

**Figure S9.** Fluorescence quantum yields (PLQY) for 15 wt.% of Ir(III) dopants in mCPCN. (Absolute PLQY measurements of doped thin films were carried out on a Hamamatsu C9920 system equipped with a xenon lamp, integrating sphere and a model C10027 photonic multi-channel analyzer.)

**Table S7.** Calculated photodegradation rate constant of the studied Ir(III) dopants.

| Dopant                              | PL $\lambda_{\max}$ | rate constant ( $\text{hr}^{-1}$ ) <sup>(a)</sup> | rel. stabilities |
|-------------------------------------|---------------------|---------------------------------------------------|------------------|
| <i>fac</i> -[Ir(ppy) <sub>3</sub> ] | 510 nm              | $2.6 \times 10^{-3}$                              | 100              |
| <b>Px-5</b>                         | 472 nm              | $1.6 \times 10^{-2}$                              | 16               |
| <b>Px-11</b>                        | 475 nm              | $4.6 \times 10^{-3}$                              | 57               |
| <b>Px-12</b>                        | 472 nm              | $4.5 \times 10^{-3}$                              | 58               |
| <b>Px-13</b>                        | 478 nm              | $5.3 \times 10^{-3}$                              | 49               |
| <b>Px-14</b>                        | 478 nm              | $4.3 \times 10^{-3}$                              | 60               |
| <b>Px-15</b>                        | 473 nm              | $3.2 \times 10^{-3}$                              | 81               |
| <b>Px-16</b>                        | 475 nm              | $2.4 \times 10^{-2}$                              | 11               |
| <i>mer</i> -[Ir(pmp) <sub>3</sub> ] | 419 nm              | $1.2 \times 10^{-2}$                              | 22               |

(a) The rate constants were obtained according to the integrated first-order rate law:  $\ln \left[ \frac{A_t}{A_0} \right] = -kt$ , – slope = rate constant, while relative stability data were calculated in reference to the decomposition rate constant of *fac*-[Ir(ppy)<sub>3</sub>].

**Table S8.** Electrochemical data and energy level of Ir(III) metal complexes **Px-11 - 16**.

|              | $E^{\text{ox}}_{1/2}$ [V] ( $\Delta E_p$ , V) <sup>(a)</sup> | HOMO [eV] <sup>(b)</sup> | Energy gap [eV] <sup>(b)</sup> | LUMO [eV] <sup>(b)</sup> |
|--------------|--------------------------------------------------------------|--------------------------|--------------------------------|--------------------------|
| <b>Px-5</b>  | 0.52 (0.08)                                                  | -5.32                    | 3.01                           | -2.31                    |
| <b>Px-11</b> | 0.55 (0.09)                                                  | -5.35                    | 3.01                           | -2.34                    |
| <b>Px-12</b> | 0.57 (0.09)                                                  | -5.37                    | 2.92                           | -2.45                    |
| <b>Px-13</b> | 0.54 (0.09)                                                  | -5.34                    | 3.01                           | -2.33                    |
| <b>Px-14</b> | 0.57 (0.09)                                                  | -5.37                    | 2.91                           | -2.46                    |
| <b>Px-15</b> | 0.55 (0.09)                                                  | -5.35                    | 2.90                           | -2.45                    |
| <b>Px-16</b> | 0.57 (0.08)                                                  | -5.37                    | 2.92                           | -2.45                    |

(a)  $E^{\text{ox}}_{1/2}$  refers to  $[(E_{\text{pa}} + E_{\text{pc}})/2]$ , where  $E_{\text{pa}}$  and  $E_{\text{pc}}$  are the anodic and cathodic wave respectively, for the oxidation half-wave potential and referenced to the ferrocene redox couple (Fc/Fc<sup>+</sup>),  $\Delta E_p = E_{\text{pa}} - E_{\text{pc}}$  conducted in CH<sub>2</sub>Cl<sub>2</sub> solution. (b) HOMO =  $|-4.8 - E^{\text{ox}}_{1/2}|$ , LUMO = HOMO - energy gap, while energy gap (eV) is calculated from the equation, i.e. 1240/PL onset (in nm).

## References

- [1] Frisch, M. J.; Trucks, G. W.; Schlegel, H. B.; Scuseria, G. E.; Robb, M. A.; Cheeseman, J. R.; Scalmani, G.; Barone, V.; Mennucci, B.; Petersson, G. A.; Nakatsuji, H.; Caricato, M.; Li, X.; Hratchian, H. P.; Izmaylov, A. F.; Bloino, J.; Zheng, G.; Sonnenberg, J. L.; Hada, M.; Ehara, M.; Toyota, K.; Fukuda, R.; Hasegawa, J.; Ishida, M.; Nakajima, T.; Honda, Y.; Kitao, O.; Nakai, H.; Vreven, T.; Montgomery, J. A.; Peralta, J. E.; Ogliaro, F.; Bearpark, M.; Heyd, J. J.; Brothers, E.; Kudin, K. N.; Staroverov, V. N.; Kobayashi, R.; Normand, J.; Raghavachari, K.; Rendell, A.; Burant, J. C.; Iyengar, S. S.; Tomasi, J.; Cossi, M.; Rega, N.; Millam, J. M.; Klene, M.; Knox, J. E.; Cross, J. B.; Bakken, V.; Adamo, C.; Jaramillo, J.; Gomperts, R.; Stratmann, R. E.; Yazyev, O.; Austin, A. J.; Cammi, R.; Pomelli, C.; Ochterski, J. W.; Martin, R. L.; Morokuma, K.; Zakrzewski, V. G.; Voth, G. A.; Salvador, P.; Dannenberg, J. J.; Dapprich, S.; Daniels, A. D.; Farkas, Ö.; Foresman, J. B.; Ortiz, J. V.; Cioslowski, J.; Fox, D. J. Gaussian 09, Revision D.01. *Gaussian 09, Revision D.01; Gaussian Inc.* **2013**, Wallingford, CT.
